# Supplementary material for: Hyperhomocysteinemia Exacerbates Cisplatin-induced Acute Kidney Injury
Source: PubMed Central journal article supplement — Int J Biol Sci. 2017 Feb 6;13(2):219–31. doi: 10.7150/ijbs.16725 (PMC5332876; doi:10.7150/ijbs.16725), 2017-02-06
Supplement: ijbsv13p0219s1.pdf [file ijbsv13p0219s1.pdf]

## Supplementary Figure 1

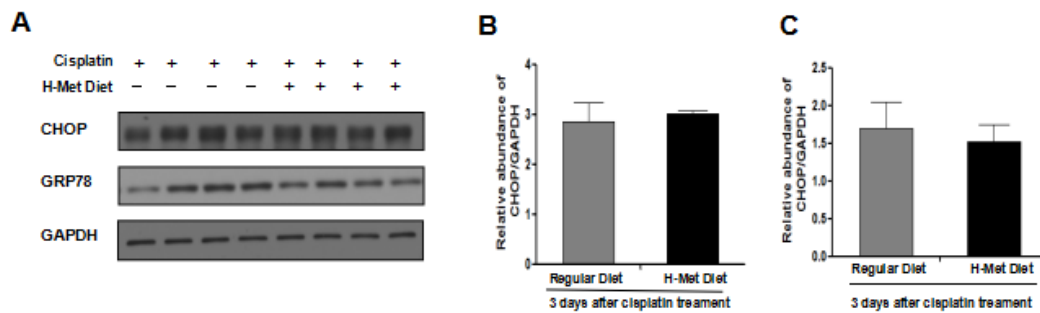

The protein level of CHOP and GRP78 is not obvious difference between control and HHcy mice at day 3 after cisplatin injection. (A) Representative Western blots show the protein level of CHOP and GRP78 in the kidneys at day 3 after cisplatin injection. GAPDH was used to verify equivalent loading. (B-C) Graphic representation of relative protein level of CHOP (B) and GRP78 (C) normalized to GAPDH. Data are expressed as mean $\pm$ SD, n=5.

## Supplementary Figure 2

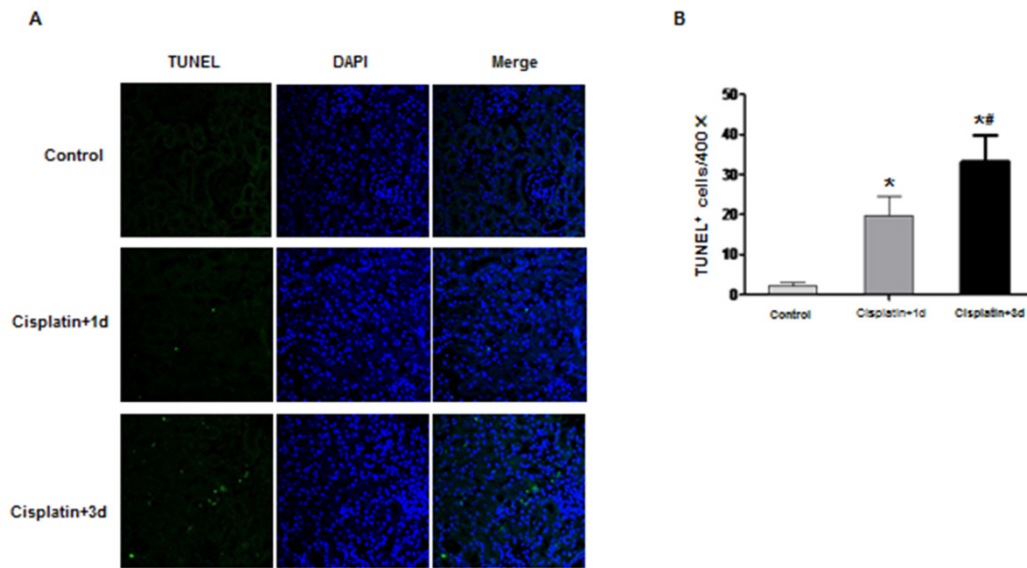

**Tubular cell apoptosis at 3 day after cisplatin injection was significantly increased compared with that at 1 day.** (A) Representative micrographs show apoptotic cell death detected by TUNEL staining at 1 day and 3 day after cisplatin injection. (B) Quantitative determination of apoptotic tubular cells at 1day and 3 day after cisplatin injection. Data are presented as numbers of apoptotic cells per 400× field. Data are expressed as mean±SD, n=5. \* $P<0.05$  versus control mice. # $P<0.05$  versus mice at 1 day after cisplatin injection.
